# Supplementary material
Source: publisher site journal article supplement (https://www.dovepress.com/article/526025)
Supplement: Supplementary file 1 [file 526025%20Supplementary%20file.docx]

**Table S1. Scoping Reviews (PRISMA-ScR) Checklist**

| **SECTION** | **ITEM** | **PRISMA-ScR CHECKLIST ITEM** | **REPORTED ON PAGE #** |
| --- | --- | --- | --- |
| **TITLE** | | | |
| Title | 1 | Identify the report as a scoping review. | 1 |
| **ABSTRACT** | | | |
| Structured summary | 2 | Provide a structured summary that includes (as applicable): background, objectives, eligibility criteria, sources of evidence, charting methods, results, and conclusions that relate to the review questions and objectives. | 1 |
| **INTRODUCTION** | | | |
| Rationale | 3 | Describe the rationale for the review in the context of what is already known. Explain why the review questions/objectives lend themselves to a scoping review approach. | 2 |
| Objectives | 4 | Provide an explicit statement of the questions and objectives being addressed with reference to their key elements (e.g., population or participants, concepts, and context) or other relevant key elements used to conceptualize the review questions and/or objectives. | 2 |
| **METHODS** | | | |
| Protocol and registration | 5 | Indicate whether a review protocol exists; state if and where it can be accessed (e.g., a Web address); and if available, provide registration information, including the registration number. | 2 |
| Eligibility criteria | 6 | Specify characteristics of the sources of evidence used as eligibility criteria (e.g., years considered, language, and publication status), and provide a rationale. | 3 |
| Information sources* | 7 | Describe all information sources in the search (e.g., databases with dates of coverage and contact with authors to identify additional sources), as well as the date the most recent search was executed. | 2 and 3 |
| Search | 8 | Present the full electronic search strategy for at least 1 database, including any limits used, such that it could be repeated. | 3 |
| Selection of sources of evidence† | 9 | State the process for selecting sources of evidence (i.e., screening and eligibility) included in the scoping review. | 3 |
| Data charting process‡ | 10 | Describe the methods of charting data from the included sources of evidence (e.g., calibrated forms or forms that have been tested by the team before their use, and whether data charting was done independently or in duplicate) and any processes for obtaining and confirming data from investigators. | 3 |
| Data items | 11 | List and define all variables for which data were sought and any assumptions and simplifications made. | 3 |
| Critical appraisal of individual sources of evidence§ | 12 | If done, provide a rationale for conducting a critical appraisal of included sources of evidence; describe the methods used and how this information was used in any data synthesis (if appropriate). | 3 |
| Synthesis of results | 13 | Describe the methods of handling and summarizing the data that were charted. | 3 |
| **RESULTS** | | | |
| Selection of sources of evidence | 14 | Give numbers of sources of evidence screened, assessed for eligibility, and included in the review, with reasons for exclusions at each stage, ideally using a flow diagram. | 3 and 16 |
| Characteristics of sources of evidence | 15 | For each source of evidence, present characteristics for which data were charted and provide the citations. | 3, 4, 5, 10, 11, 12, 13, 14 and 15 |
| Critical appraisal within sources of evidence | 16 | If done, present data on critical appraisal of included sources of evidence (see item 12). | 3 and 16 |
| Results of individual sources of evidence | 17 | For each included source of evidence, present the relevant data that were charted that relate to the review questions and objectives. | 3, 4, 5, 10, 11, 12, 13, 14 and 15 |
| Synthesis of results | 18 | Summarize and/or present the charting results as they relate to the review questions and objectives. | 6 |
| **DISCUSSION** | | | |
| Summary of evidence | 19 | Summarize the main results (including an overview of concepts, themes, and types of evidence available), link to the review questions and objectives, and consider the relevance to key groups. | 6 |
| Limitations | 20 | Discuss the limitations of the scoping review process. | 6 and 7 |
| Conclusions | 21 | Provide a general interpretation of the results with respect to the review questions and objectives, as well as potential implications and/or next steps. | 7 |
| **FUNDING** | | | |
| Funding | 22 | Describe sources of funding for the included sources of evidence, as well as sources of funding for the scoping review. Describe the role of the funders of the scoping review. | 7 |

JBI = Joanna Briggs Institute; PRISMA-ScR = Preferred Reporting Items for Systematic reviews and Meta-Analyses extension for Scoping Reviews.

* Where *sources of evidence* (see second footnote) are compiled from, such as bibliographic databases, social media platforms, and Web sites.

† A more inclusive/heterogeneous term used to account for the different types of evidence or data sources (e.g., quantitative and/or qualitative research, expert opinion, and policy documents) that may be eligible in a scoping review as opposed to only studies. This is not to be confused with *information sources* (see first footnote).

‡ The frameworks by Arksey and O’Malley (6) and Levac and colleagues (7) and the JBI guidance (4, 5) refer to the process of data extraction in a scoping review as data charting*.*

§The process of systematically examining research evidence to assess its validity, results, and relevance before using it to inform a decision. This term is used for items 12 and 19 instead of "risk of bias" (which is more applicable to systematic reviews of interventions) to include and acknowledge the various sources of evidence that may be used in a scoping review (e.g., quantitative and/or qualitative research, expert opinion, and policy document).

# Page number.

**Table S2. Search query for MEDLINE (via Pubmed)**

|  | Search strategy | Retrieves |
| --- | --- | --- |
| #1 | ("Telemedicine"[Mesh] OR telemed*[tiab] OR tele-med*[tiab] OR telehealth*[tiab] OR tele-health*[tiab] OR telerehab*[tiab] OR tele-rehab*[tiab] OR teleconsult*[tiab] OR tele-consult*[tiab] OR tele-coach*[tiab] OR telecoach*[tiab] OR tele-care*[tiab] OR telecare*[tiab] OR tele-screen*[tiab] OR telescreen*[tiab] OR tele-therap*[tiab] OR teletherap*[tiab] OR tele-diagnos*[tiab] OR telediagnos*[tiab] OR tele-mentor*[tiab] OR telementor*[tiab] OR telepsyc*[tiab] OR tele-psyc*[tiab]) OR (("Videoconferencing"[Mesh] OR teleco*[tiab] OR tele-co*[tiab] OR telemetr*[tiab] tele-metr*[tiab] OR tele-home*[tiab] OR telehome*[tiab] OR videoconf*[tiab] OR video-conf*[tiab] OR web-based[tiab] OR internet-based[tiab] home-based[tiab] OR Google Meet[tiab] OR Cisco Webex[tiab] OR Microsoft Teams[tiab] OR remote*[tiab]) AND ("therapy" [Subheading] OR "Therapeutics"[Mesh] OR rehab*[tiab] OR therap*[tiab] OR treatment*[tiab] OR consult*[tiab] OR care OR monitor*[tiab] OR counsel*[tiab])) | 124,396 |
| #2 | ("Hematopoietic Stem Cell Transplantation"[Mesh] OR (hematopoietic[tiab] OR haematopoietic[tiab]) AND transplant*[tiab])) | 84,994 |
| #3 | #1 AND #2 | 97 |

**Table S3. Search query for SCOPUS**

|  | Search strategy | Retrieves |
| --- | --- | --- |
| #1 | ( TITLE-ABS-KEY ( telemedicine OR telemed* OR tele-med* OR telehealth* OR tele-health* OR telerehab* OR tele-rehab* OR teleconsult* OR tele-consult* OR tele-coach* OR telecoach* OR tele-care* OR telecare* OR tele-screen* OR telescreen* OR tele-therap* OR teletherap* OR tele-diagnos* OR telediagnos* OR tele-mentor* OR telementor* OR telepsyc* OR tele-psyc* ) ) OR ( TITLE-ABS-KEY ( videoconferencing OR teleco* OR tele-co* OR telemetr* OR tele-metr* OR tele-home* OR telehome* OR videoconf* OR video-conf* OR "web-based" OR "internet-based" OR "home-based" OR "google meet" OR "cisco webex" OR "microsoft teams" OR remote* ) AND TITLE-ABS-KEY ( rehab* OR therap* OR treatment* OR consult* OR care OR counsel* ) ) | 263,928 |
| #2 | TITLE-ABS-KEY ("Hematopoietic Stem Cell Transplantation") OR (TITLE-ABS-KEY (hematopoietic OR haematopoietic) AND TITLE-ABS-KEY (transplant*)) | 111,857 |
| #3 | #1 AND #2 AND #3 | 321 |

**Table S4. Search query for Web of Sciences**

|  | Search strategy | Retrieves |
| --- | --- | --- |
| #1 | TS=(telemedicine OR telemed* OR tele-med* OR telehealth* OR tele-health* OR telerehab* OR tele-rehab* OR teleconsult* OR tele-consult* OR tele-coach* OR telecoach* OR tele-care* OR telecare* OR tele-screen* OR telescreen* OR tele-therap* OR teletherap* OR tele-diagnos* OR telediagnos* OR tele-mentor* OR telementor* OR telepsyc* OR tele-psyc*) OR TS=(videoconferencing OR teleco* OR tele-co* OR telemetr* OR tele-metr* OR tele-home* OR telehome* OR videoconf* OR video-conf* OR "web-based" OR "internet-based" OR "home-based" OR "Google Meet" OR "Cisco Webex" OR "Microsoft Teams" OR remote*) AND TS=(therapy OR therapeutics OR rehab* OR therap* OR treatment* OR consult* OR care OR monitor* OR counsel*) | 199,722 |
| #2 | TS= ("Hematopoietic Stem Cell Transplantation") OR (TS= (hematopoietic OR haematopoietic) AND TS=(transplant*)) | 82,032 |
| #3 | #1 AND #2 AND #3 | 153 |

**Table S5. Search query for Embase**

|  | Search strategy | Retrieves |
| --- | --- | --- |
| #1 | ('telemedicine'/exp OR 'telemed*':ab,ti OR 'tele-med*':ab,ti OR 'telehealth*':ab,ti OR 'tele-health*':ab,ti OR 'telerehab*':ab,ti OR 'tele-rehab*':ab,ti OR 'teleconsult*':ab,ti OR 'tele-consult*':ab,ti OR 'tele-coach*':ab,ti OR 'telecoach*':ab,ti OR 'tele-care*':ab,ti OR 'telecare*':ab,ti OR 'tele-screen*':ab,ti OR 'telescreen*':ab,ti OR 'tele-therap*':ab,ti OR 'teletherap*':ab,ti OR 'tele-diagnos*':ab,ti OR 'telediagnos*':ab,ti OR 'tele-mentor*':ab,ti OR 'telementor*':ab,ti OR 'telepsyc*':ab,ti OR 'tele-psyc*':ab,ti)    ('videoconferencing'/exp OR 'teleco*':ab,ti OR 'tele-co*':ab,ti OR 'telemetr*':ab,ti OR 'tele-metr*':ab,ti OR 'tele-home*':ab,ti OR 'telehome*':ab,ti OR 'videoconf*':ab,ti OR 'video-conf*':ab,ti OR 'web-based':ab,ti OR 'internet-based':ab,ti OR 'home-based':ab,ti OR 'Google Meet':ab,ti OR 'Cisco Webex':ab,ti OR 'Microsoft Teams':ab,ti OR 'remote*':ab,ti) AND ('therapy'/exp OR 'therapeutics'/exp OR 'rehab*':ab,ti OR 'therap*':ab,ti OR 'treatment*':ab,ti OR 'consult*':ab,ti OR 'care':ab,ti OR 'monitor*':ab,ti OR 'counsel*':ab,ti) | 241,251 |
| #2 | ('hematopoietic stem cell transplantation'/exp) OR ((hematopoietic OR haematopoietic) AND (transplant*)) | 155,721 |
| #4 | #1 AND #2 | 547 |

**Table S6. Excluded articles during the full-text revision**

| Author, year | Title | Reasons for exclusion |
| --- | --- | --- |
| Frutos et al, 2019 | Bridging the gap using telemedicine: Optimizing an existing autologous hematopoietic SCT unit into an allogeneic hematopoietic SCT unit in Paraguay with the help of the WBMT | Wrong outcome, wrong publication type |
| Mawson et al, 2021 | Feasibility and benefits of a structured prehabilitation programme prior to autologous stem cell transplantation (ASCT) in patients with myeloma; a prospective feasibility study | Wrong intervention: No telehealth reported |
| Abo et al, 2021 | Feasibility of early-commencing group-based exercise in allogeneic bone marrow transplantation: the BOOST study | Wrong intervention: No telehealth reported |
| Potiaumpai et al, 2024 | IMPROVE-BMT: A Pilot Randomized Controlled Trial of Prehabilitation Exercise for Adult Hematopoietic Stem Cell Transplant Recipients | Wrong intervention: No telehealth reported |
| Bernhard et al, 2019 | Pilot Study of Home Vitals and Activity Monitoring for Allogeneic Hematopoietic Cell Transplant Recipients | No exercise reported, abstract paper, not a rehabilitation or exercise intervention |
| De Geest et al, 2022 | The SMILe integrated care model in allogeneic SteM cell TransplantatIon faciLitated by eHealth: a protocol for a hybrid effectiveness-implementation randomised controlled trial | Wrong publication type: Protocol |
| Lee et al, 2022 | Telehealth exercise to Improve Physical function and frailty in patients with multiple myeloma treated with autologous hematopoietic Stem cell transplantation (TIPS): protocol of a randomized controlled trial | Wrong publication type: Protocol |
| Sung et al, 2021 | A Phase 1 Study of the Safety and Feasibility of Improving Cardiorespiratory Fitness through a Remotely Monitored, Mobile Health Supported High Intensity Interval Training Program (REMM-HIIT) | Wrong publication type: Poster |
| Ketterl et al, 2021 | Closing the Gaps: Progress in the Care of Adolescents and Young Adults with Cancer | Wrong intervention |
| Tam et al, 2023 | A longitudinal multidimensional rehabilitation program for patients undergoing allogeneic blood and marrow transplantation (CaRE-4- alloBMT): Protocol for a phase II feasibility pilot randomized controlled trial | Wrong publication type: Pilot |
